# Supplementary material
Source: Elsevier journal article supplement (https://www.sciencedirect.com/science/article/pii/S253104372200023X)
Supplement: mmc1 [file S253104372200023X:mmc1.docx]

**Supplementary files**


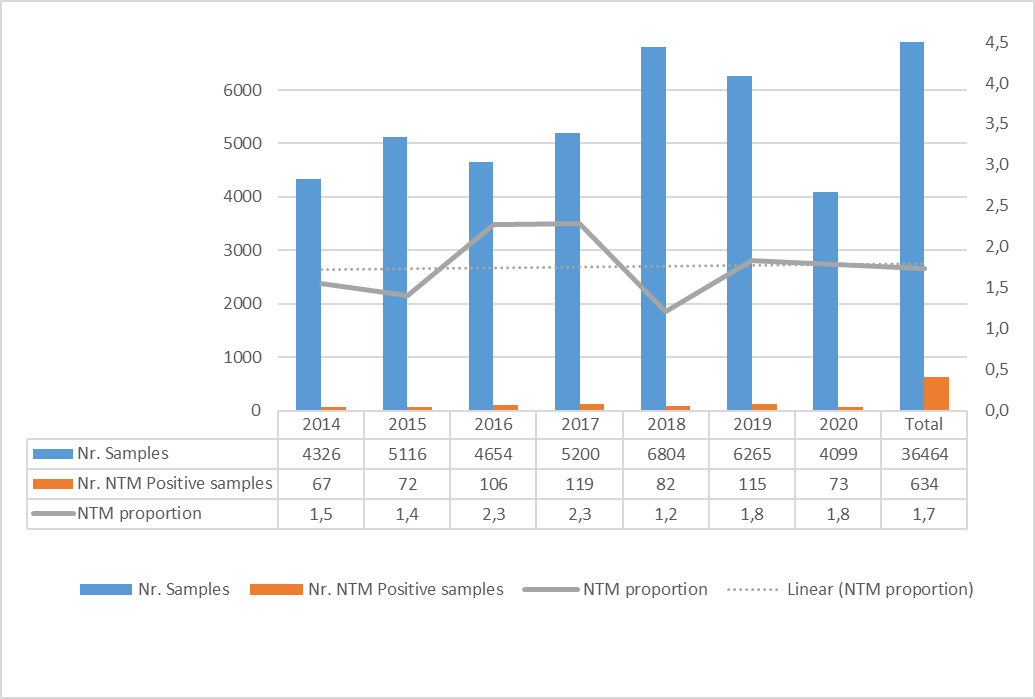


**Supplementary figure 1**. Number of positive NTM isolations in Portugal during 2014-2020.

**Supplementary table 1.** Distribution of NTM positive cases by age and gender.

| **Age group** | **NTM positive Patients (n)** | **Gender male (%)** | **Definite cases (n)**  **(all NTM)** | **Most Prevalent NTM**  **(%)** |
| --- | --- | --- | --- | --- |
| < 15 yr | 4 | 75 | 0 | *M. gordonae* (50) |
| 15-19 yr | 3 | 0 | 1 | MABC** (33.3) |
| 20-24 yr | 9 | 33.3 | 2 | MAC* (44.4) |
| 25-29 yr | 8 | 37.5 | 3 | MABC** (62.5) |
| 30-34 yr | 25 | 64.0 | 3 | MAC* (40.0) |
| 35-39 yr | 21 | 52.4 | 2 | MAC* (52.4) |
| 40-44 yr | 42 | 59.5 | 2 | MAC* (28.,6) |
| 45-49 yr | 58 | 72.4 | 6 | MAC* (46.5) |
| 50-54 yr | 63 | 60.3 | 7 | MAC* (38.0) |
| 55-59 yr | 91 | 56.0 | 13 | MAC* (45.0) |
| 60-64 yr | 92 | 57.6 | 10 | MAC* (41.3) |
| ≥65 yr | 500 | 59.0 | 43 | MAC* (41.6) |
| unkown | 28 | 44.8 | 1 | MABC** (20.6) |
| Total | 944 | 58.6 | 93 | MAC* (40,7) |

* MAC – *Mycobacterium avium complex*

**MABC - *Mycobacterium abscessus-chelonae complex*


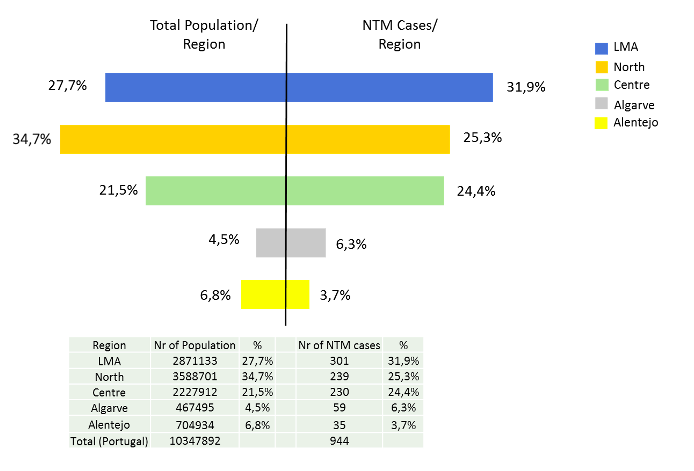


**Supplementary figure 2** Demography of the NTM cases analyzed; comparison of the total number of population (left side of the figure) with the number of NTM cases (right side of the figure) by region.

**Supplementary table 2.** Number of patients infected with MAC (*Mycobacterium avium complex*), MABC (*Mycobacterium abscessus-chelonae complex*) and *M. fortuitum* by gender and region of isolation.

|  | **MAC N (%)** | **MABC N (%)** | ***M. fortuitum* N (%)** |
| --- | --- | --- | --- |
| **Total** | 385 (40.8%) | 91 (9.6%) | 59 (6.3%) |
| **Age category** |  |  |  |
| < 15 yr | 0 (0%) | 1 (1.1%) | 0 (0%) |
| 15-34 yr | 14 (3.6%) | 8 (8.8%) | 3 (5.1%) |
| 35-64 yr | 152 (39.5%) | 27 (28.6%) | 22 (37.3%) |
| ≥ 65 yr | 211 (54.8%) | 49 (53.8%) | 33 (55.9%) |
| Unknown | 8 (0.26%) | 6 (6.6%) | 1 (1.7%) |
| **% male** | 205 (53.2%) | 50 (54.9%) | 38 (64.4%) |
| **Region** | |  |  |
| North | 148 (38.4%) | 16 (17.6%) | 9 (15.3%) |
| Centre | 87 (22.6%) | 18 (19.8%) | 14 (23.7%) |
| LMA | 97 (25.2%) | 29 (31.9%) | 19 (32.2%) |
| Alentejo | 13 (3.4%) | 5 (5.5%) | 1 (1.7%) |
| Algarve | 12 (3.1%) | 10 (11%) | 8 (13.6%) |
| Açores | 7 (1.8%) | 3 (3.3%) | 6 (10.2%) |
| Madeira | 2 (0.5%) | 1 (1.1%) | 0 (0%) |
| Unknown | 19 (4.9%) | 9 (9.9%) | 2 (3.4%) |

**Supplementary table 3.** Distribution of the most prevalent NTM species by case classification and region of isolation.

|  | **North** | **Centre** | **LMA** | **Alentejo** | **Algarve** | **Açores** | **Madeira** |
| --- | --- | --- | --- | --- | --- | --- | --- |
| **Total infections (N)** | 239 | 230 | 301 | 35 | 59 | 19 | 7 |
| **MAC* N (%)** | 148 (61.9) | 87 (37.8) | 97 (32.2) | 13 (37.1) | 12 (20.3) | 7 (36.8) | 2 (28.6) |
| **MABC** N (%)** | 16 (6.7) | 18 (7.8) | 29 (9.6) | 5 (14.3) | 10 (16.9) | 3 (15.8) | 1 (14.3) |
| ***M. fortuitum* N (%)** | 9 (3.8) | 14 (6.1) | 19 (6.3) | 1 (2.9) | 8 (13.6) | 6 (31.6) | 0 |
| **Definite Cases (N)** | 33 | 14 | 28 | 3 | 5 | 6 | 1 |

* MAC – *Mycobacterium avium complex*

**MABC - *Mycobacterium abscessus-chelonae complex*
